# Supplementary material
Source: ML conference proceedings conference paper supplement (https://proceedings.mlr.press/v77/shiino17a.html)
Supplement: Supplementary file [file shiino17a-supp.pdf]

## Supplementary Material to Whitening-Free Least-Squares Non-Gaussian Component Analysis

### Detail of Artificial Datasets

Here, we describe the detail of the artificial datasets used in Section 4.2. The noise components  $\mathbf{n}$  are generated as follows:

1. The  $\mathbf{n}$  is sampled from the centered Gaussian distribution with covariance matrix  $\text{diag}(10^{-2r}, 10^{-2r+4r/7}, 10^{-2r+8r/7}, \dots, 10^{2r})$ , where  $\text{diag}(\cdot)$  denotes the diagonal matrix.
2. The sampled  $\mathbf{n}$  is rotated as  $\mathbf{n}'' \in \mathbb{R}^8$  by applying the following rotation matrix  $\mathbf{R}^{(i,j)}$  for all  $i, j = 3, \dots, 10$  such that  $i < j$ :

$$\begin{aligned} R_{i,i}^{(i,j)} &= \cos(\pi/4), & R_{i,j}^{(i,j)} &= -\sin(\pi/4), \\ R_{j,i}^{(i,j)} &= \sin(\pi/4), & R_{j,j}^{(i,j)} &= \cos(\pi/4), \\ R_{k,k}^{(i,j)} &= 1 \quad (k \neq i, k \neq j), & R_{k,l}^{(i,j)} &= 0 \quad (\text{otherwise}). \end{aligned}$$

3. The rotated  $\mathbf{n}$  is normalized for each dimension.

By this construction, increasing  $r$  corresponds to increasing the *condition number* of the data covariance matrix (see Figure 4). Thus, the larger  $r$  is, the more ill-posed the data covariance matrix is.

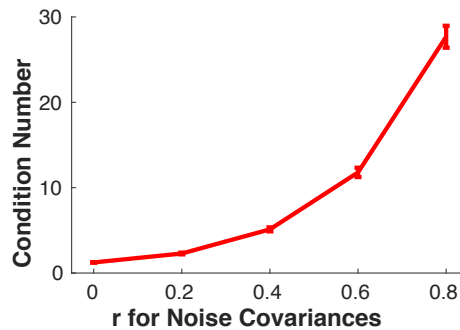

Figure 4: Condition number of the data covariance matrix as a function of experiment parameter  $r$  (with non-Gaussian components generated from the Gaussian mixture).
